# Supplementary material for: Longitudinal association between dietary protein intake and survival in peritoneal dialysis patients
Source: PubMed Central journal article supplement (PMC9987727; doi:10.1080/0886022x.2023.2182605), 2023-03-02

Figure S1. Model fit statistics for LCMM models considering one to four classes.

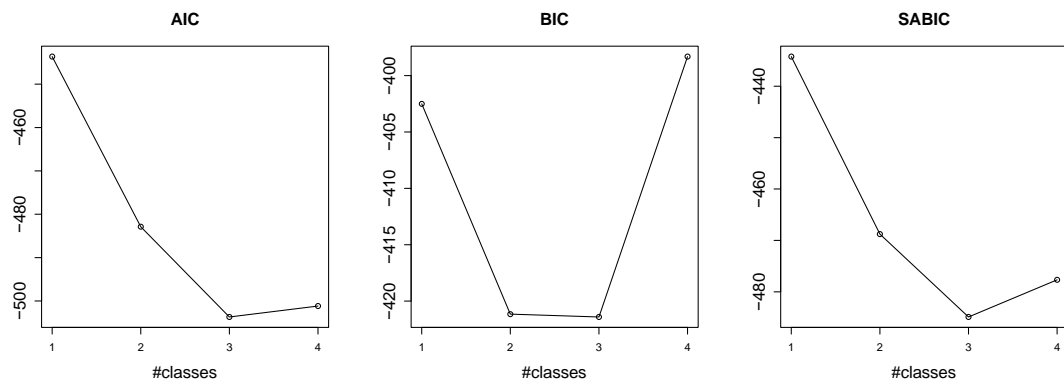

Supplement: IRNF_A_2182605_SM5801.pdf [file IRNF_A_2182605_SM5801.pdf]
