# Supplementary material for: Longitudinal association between dietary protein intake and survival in peritoneal dialysis patients
Source: PubMed Central journal article supplement (PMC9987727; doi:10.1080/0886022x.2023.2182605), 2023-03-02
Supplement: IRNF_A_2182605_SM5903.pdf [file IRNF_A_2182605_SM5903.pdf]

Table S1. Model fit statistics for LCMM models considering one to four classes.

| Number of Classes | AIC      | BIC      | SABIC    | Number of patients assigned to each class |     |     |    |
|-------------------|----------|----------|----------|-------------------------------------------|-----|-----|----|
|                   |          |          |          | 1                                         | 2   | 3   | 4  |
| 1                 | -443.643 | -402.506 | -434.242 | 452                                       |     |     |    |
| 2                 | -482.868 | -421.163 | -468.768 | 404                                       | 48  |     |    |
| 3                 | -503.688 | -421.414 | -484.887 | 154                                       | 253 | 45  |    |
| 4                 | -501.156 | -398.314 | -477.655 | 138                                       | 55  | 223 | 36 |

LCMM, latent class mixed models; AIC, Akaike information criterion; BIC, Bayesian information criterion; SABIC, sample size adjusted BIC
